# Supplementary material for: Selection Transforms the Landscape of Genetic Variation Interacting with Hsp90
Source: PubMed Central journal article supplement (PMC5074785; doi:10.1371/journal.pbio.2000465), 2016-10-21

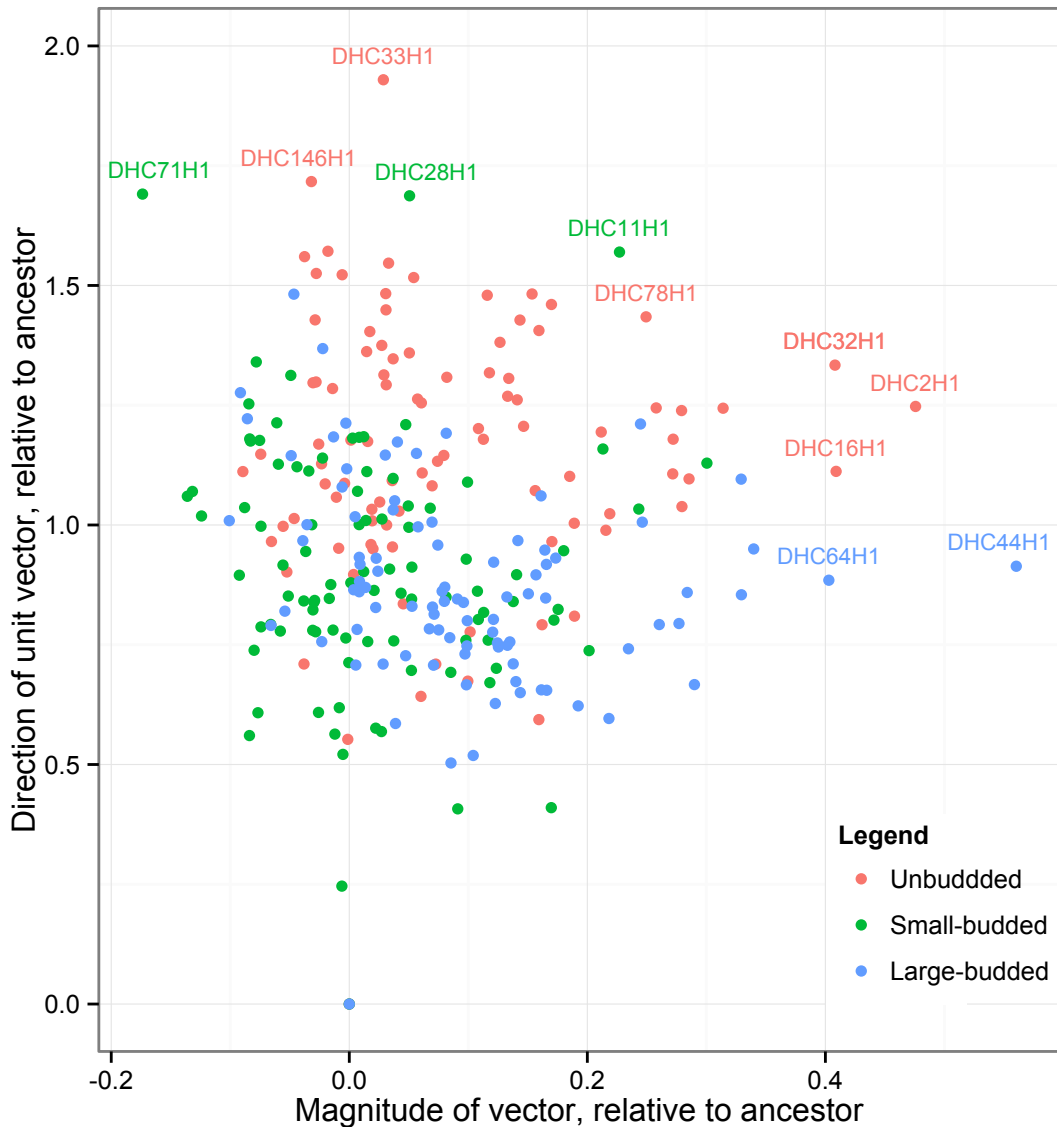

Supplement: pbio.2000465.s003.pdf [file pbio.2000465.s003.pdf]
