# Supplementary material for: Selection Transforms the Landscape of Genetic Variation Interacting with Hsp90
Source: PubMed Central journal article supplement (PMC5074785; doi:10.1371/journal.pbio.2000465), 2016-10-21

Standard deviation between lines in GdA-condition

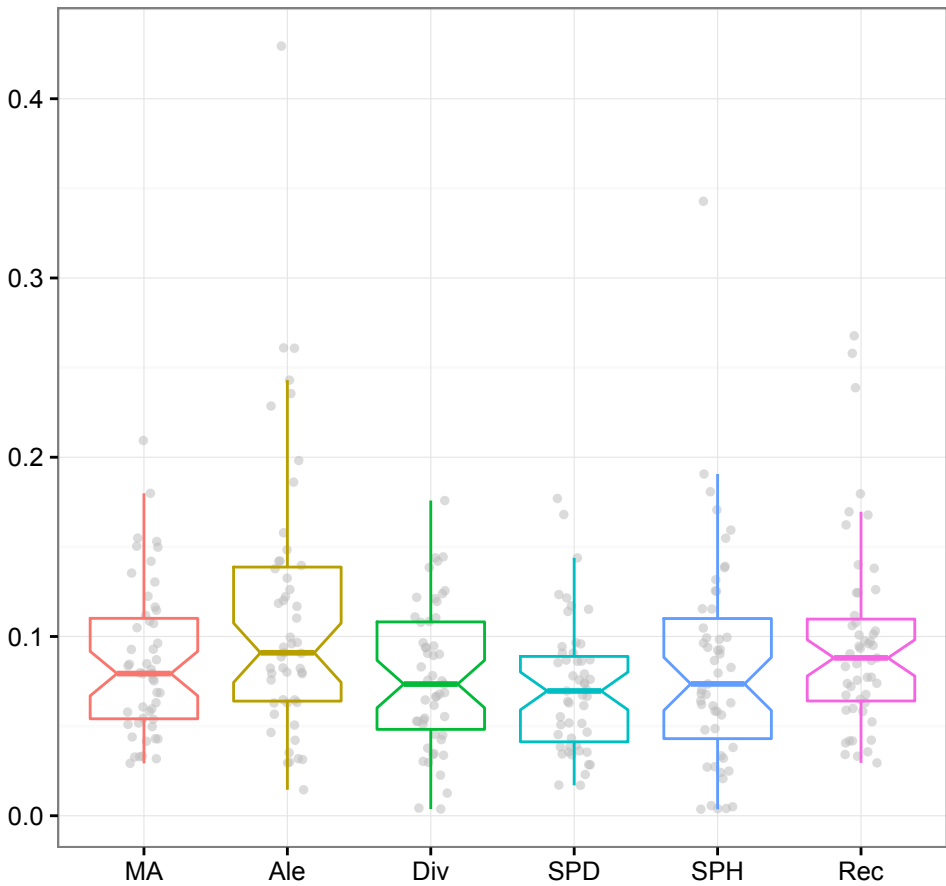

Supplement: pbio.2000465.s006.pdf [file pbio.2000465.s006.pdf]
